# Supplementary material
Source: publisher figshare collection journal article supplement (https://acs.figshare.com/ndownloader/files/4678033)
Supplement: Supplementary file 1 [file 4678033]

39
Molecule B: Amine Anion Equilibrium
  H        0.19829       -2.29334        0.15477
  C       -1.70977        1.08067        0.07199
  C       -0.32721        1.09349        0.08805
  C        0.40631       -0.14399        0.11162
  C       -0.34939       -1.35366        0.13464
  C       -1.72428       -1.35647        0.12018
  C       -2.45463       -0.13424        0.08374
  C        1.80044       -0.14127        0.08881
  C       -3.85423       -0.12561        0.05511
  H       -2.27273       -2.29534        0.13398
  N        0.38878        2.29629        0.12189
  H       -2.25361        2.02376        0.05599
  H        1.34652        2.18225       -0.19470
  H       -0.07325        3.05769       -0.35980
  C        3.03565       -0.11149        0.05289
  C       -5.08451       -0.11518        0.02168
  S        9.06143       -0.13298       -0.15360
  H        9.36149       -0.13647        1.17373
  C        4.43239       -0.11294        0.01132
  C        5.18536        1.09858        0.02104
  C        6.56732        1.08813       -0.02508
  C        7.28124       -0.12476       -0.07570
  C        6.55504       -1.33155       -0.09324
  C        5.17309       -1.33087       -0.04965
  H        7.11769        2.02697       -0.02157
  H        4.62696       -2.27100       -0.06543
  H        7.09626       -2.27431       -0.14419
  H        4.65146        2.04512        0.06671
  C       -9.32691       -0.08533       -0.11540
  C       -8.60615        1.11528       -0.10743
  C       -7.21920        1.11303       -0.06137
  C       -6.48949       -0.10516       -0.02170
  C       -7.23696       -1.31314       -0.02995
  C       -8.62374       -1.29570       -0.07634
  H       -6.66676        2.04958       -0.05521
  H       -9.16900       -2.23895       -0.08245
  H       -6.69872       -2.25741        0.00010
  H       -9.13707        2.06621       -0.13769
  H      -10.41417       -0.07799       -0.15110
